# Supplementary material for: Association between low ambient temperature during pregnancy and adverse birth outcomes: A systematic review and meta-analysis
Source: PubMed Central journal article supplement — Chin Med J (Engl). 2023 Feb 13;136(19):2307–15. doi: 10.1097/CM9.0000000000002361 (PMC10538931; doi:10.1097/cm9.0000000000002361), 2023-02-13
Supplement: cm9-136-2307-s001.pdf [file cm9-136-2307-s001.pdf]

**Supplementary Figure 1:** Funnel plot of preterm birth studies.

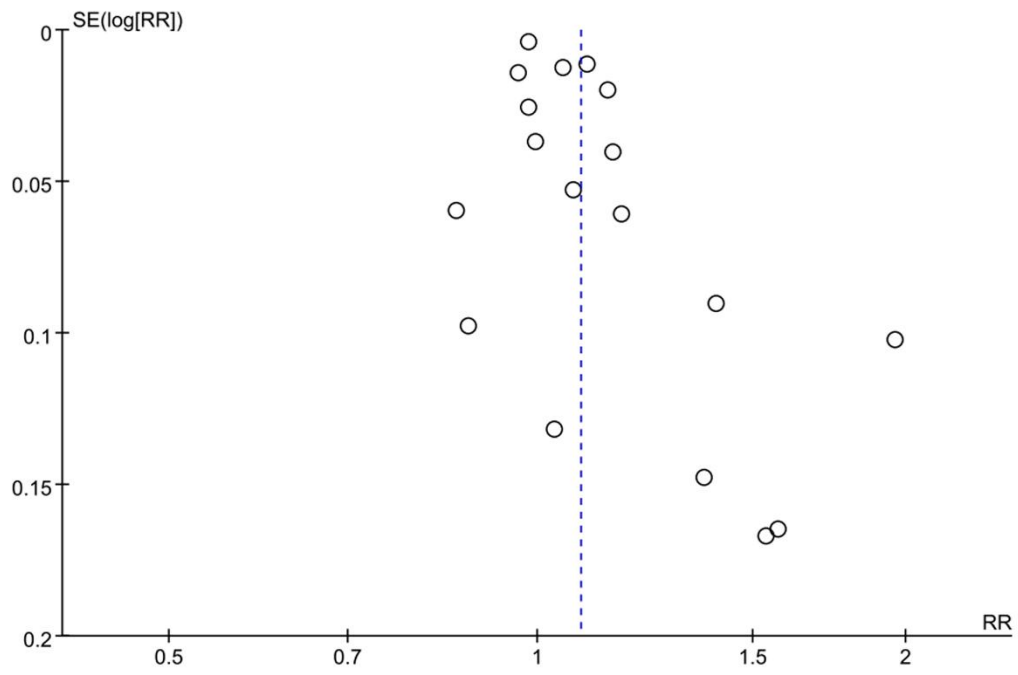

Supplementary Figure 2: The sensitive analysis of preterm birth studies.

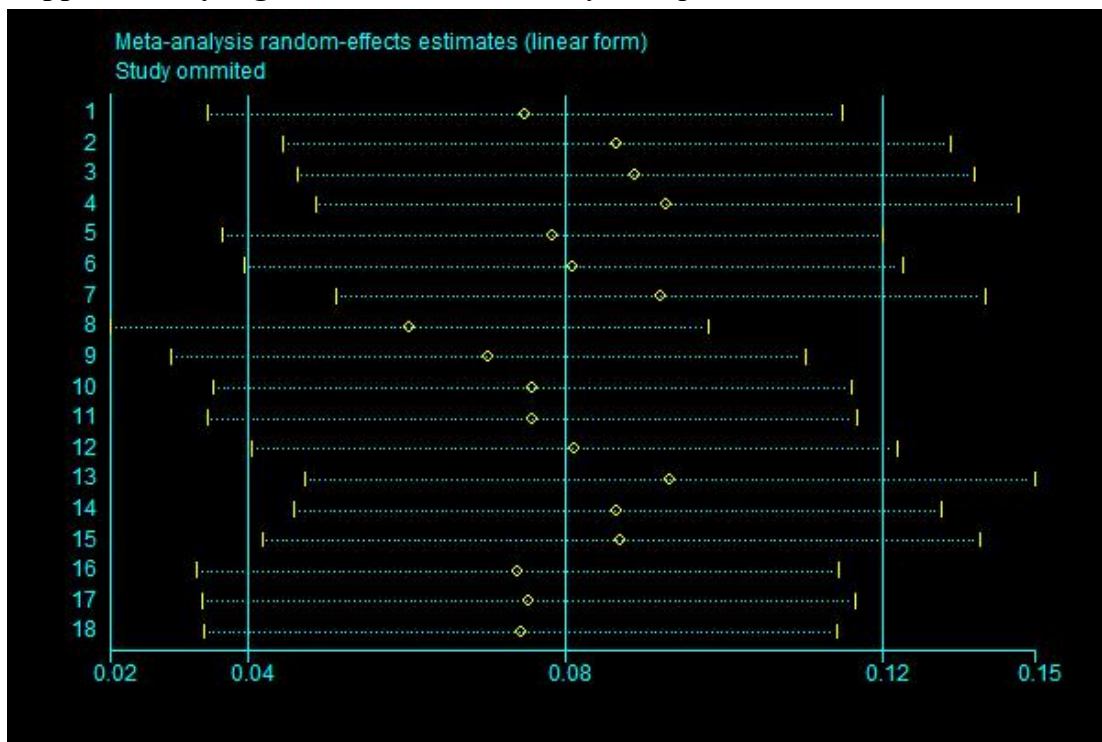

Supplemental Figure 3. Preterm birth sort by exposure time windows.

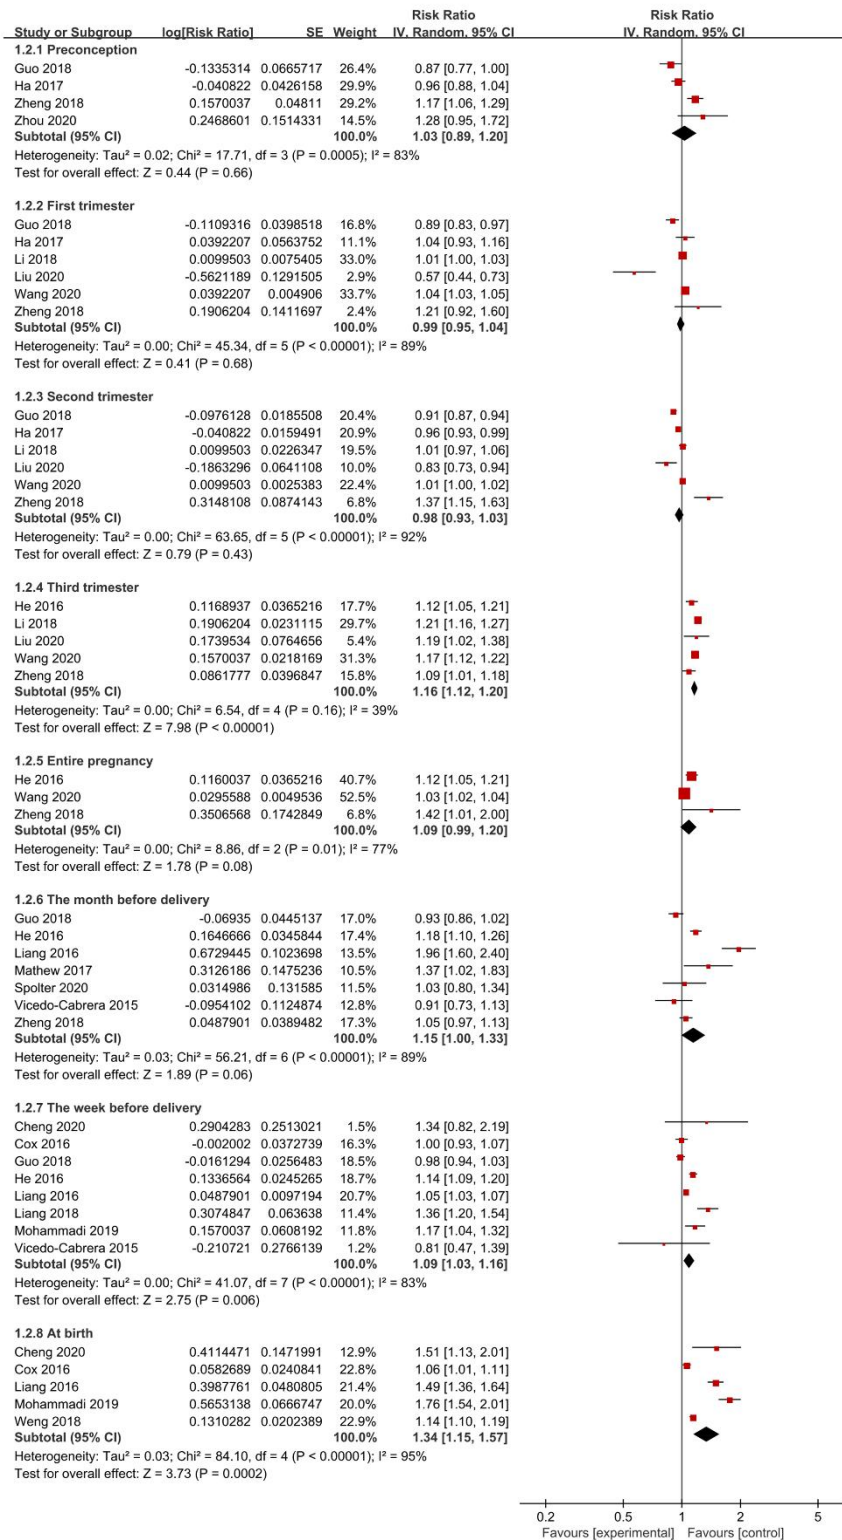

Supplementary Figure 4: Preterm birth sort by different temperature exposure levels.

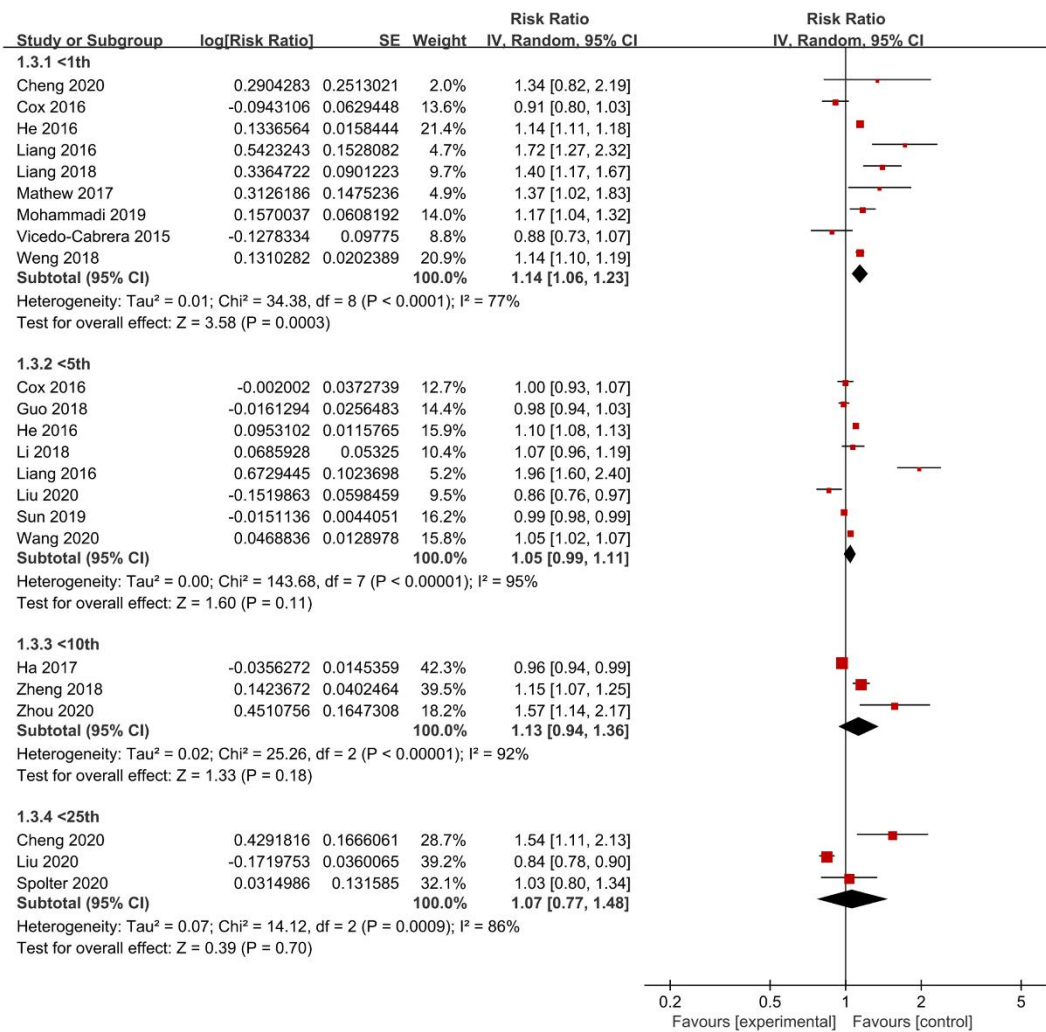

Supplementary Figure 5: Preterm birth sort by different climate areas.

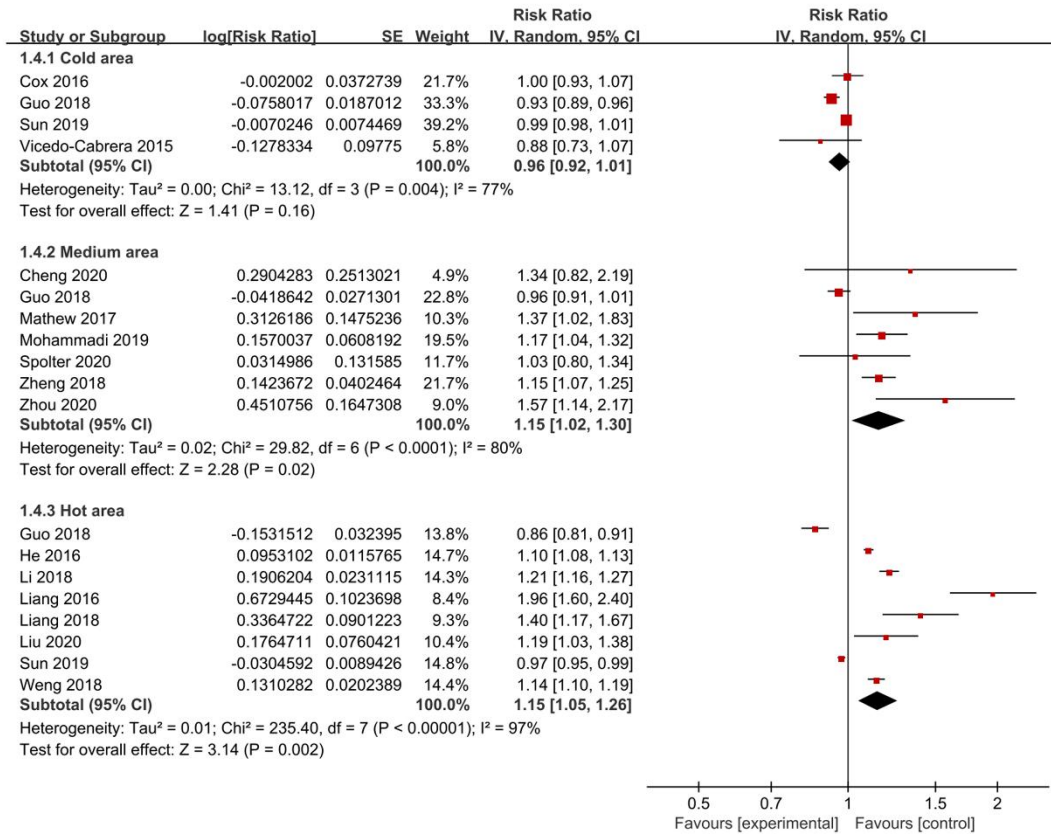

Supplementary Figure 6: Preterm birth sort by different ethnicities.

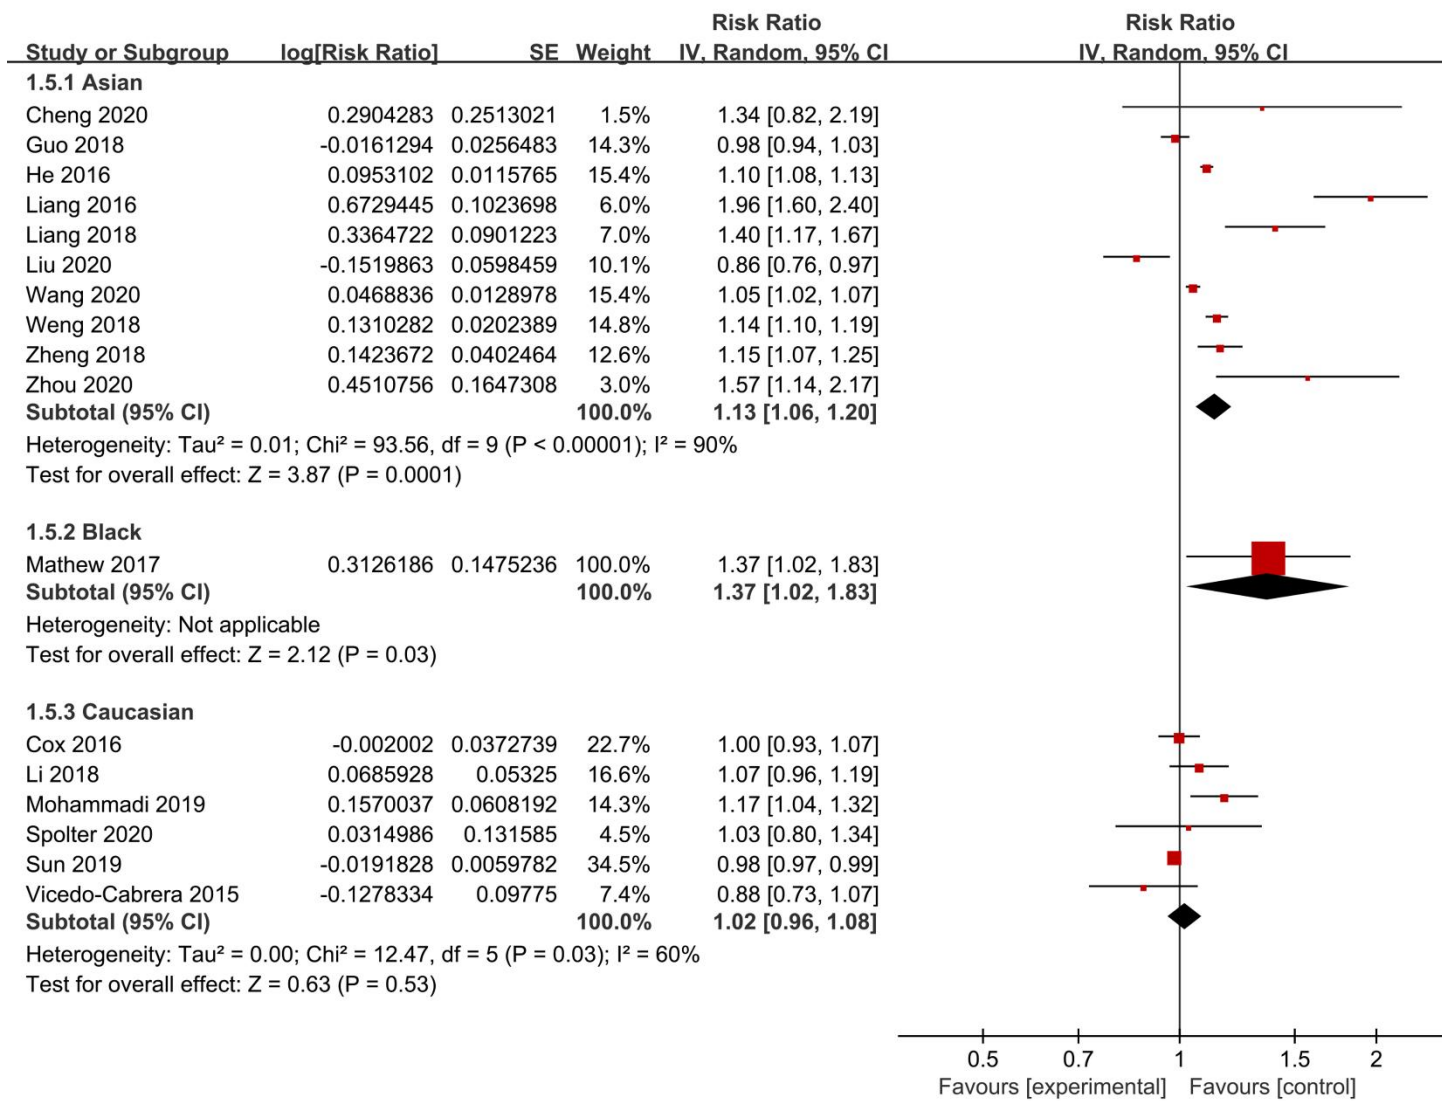

**Supplementary Figure 7: Preterm birth sort by various definitions of extreme low temperature.**

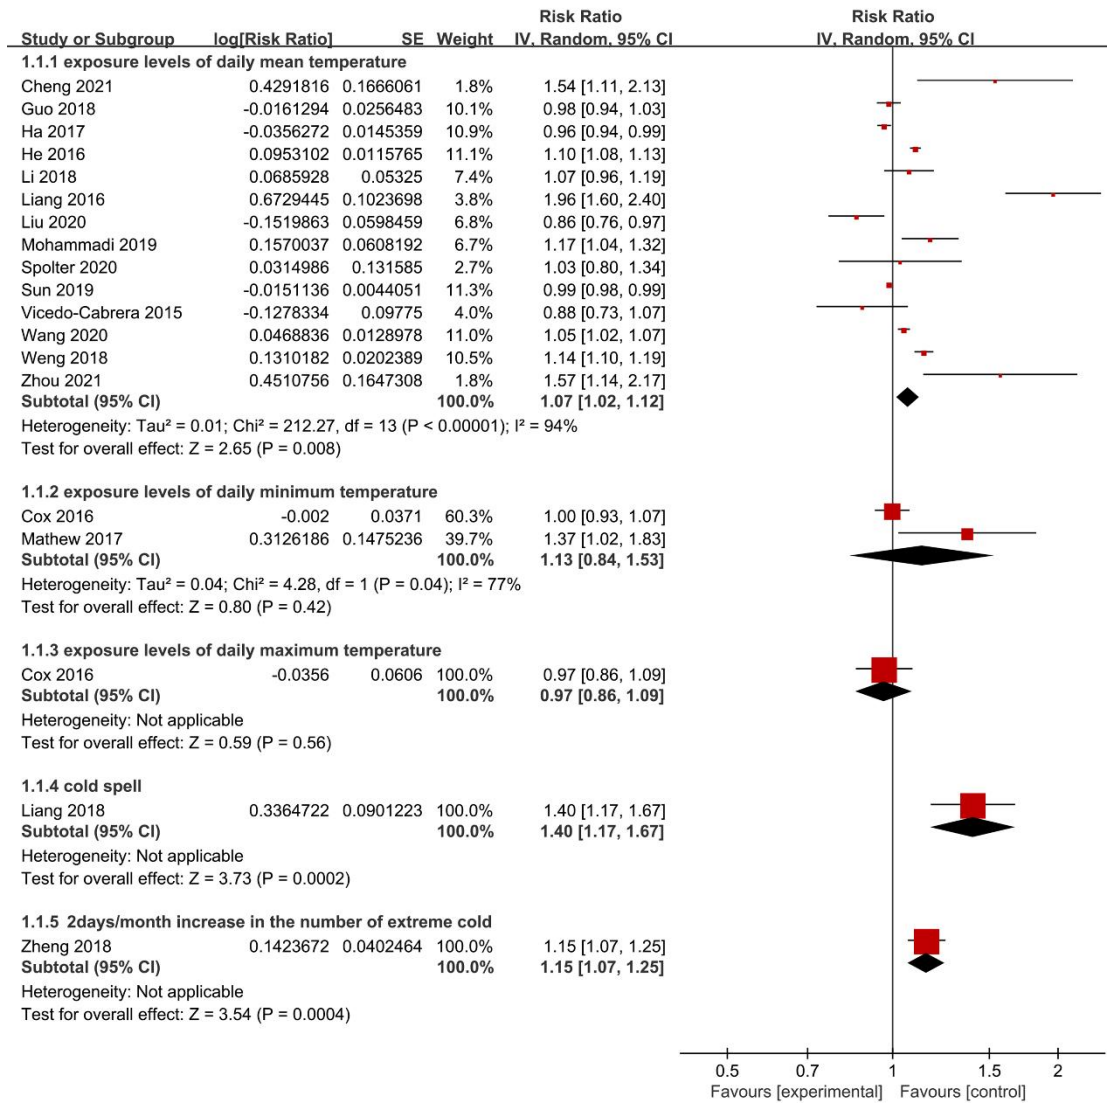

Supplementary Figure 8: Preterm birth sort by different methodological models.

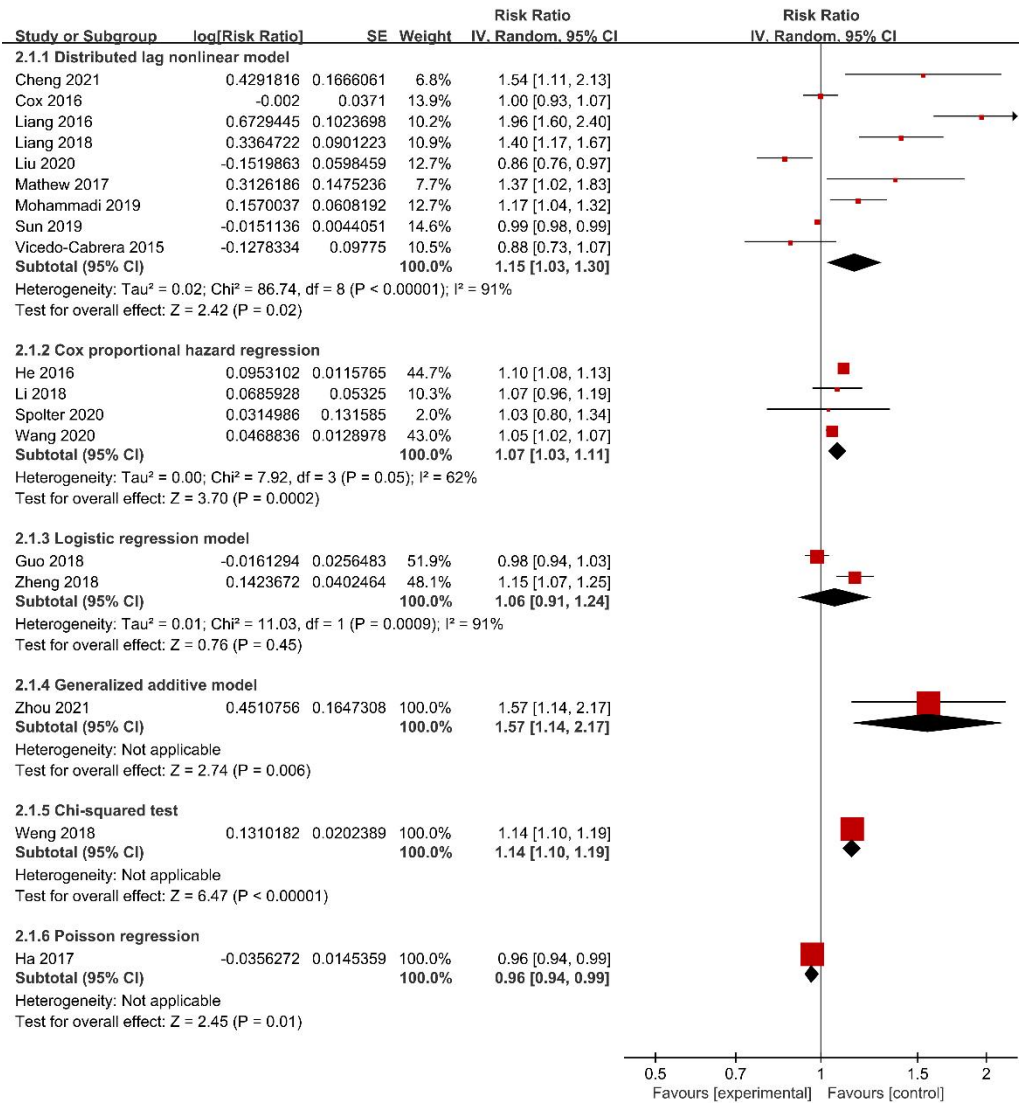



**Supplementary Figure 9: LBW sort by different exposure time windows. LBW: Low birth weight.**

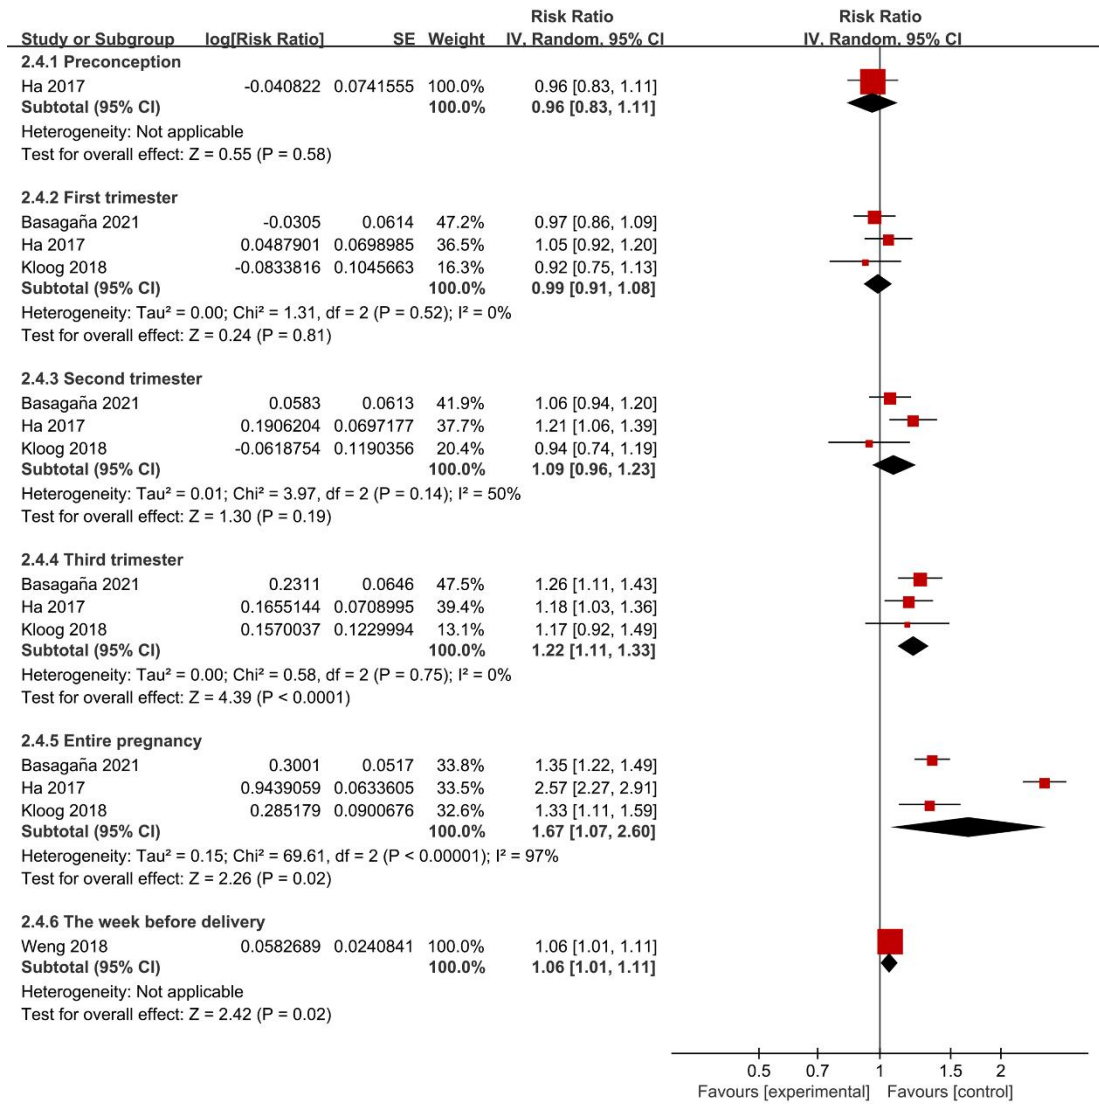

**Supplementary Figure 10: SGA sort by different exposure time windows. SGA: Small for gestational age.**

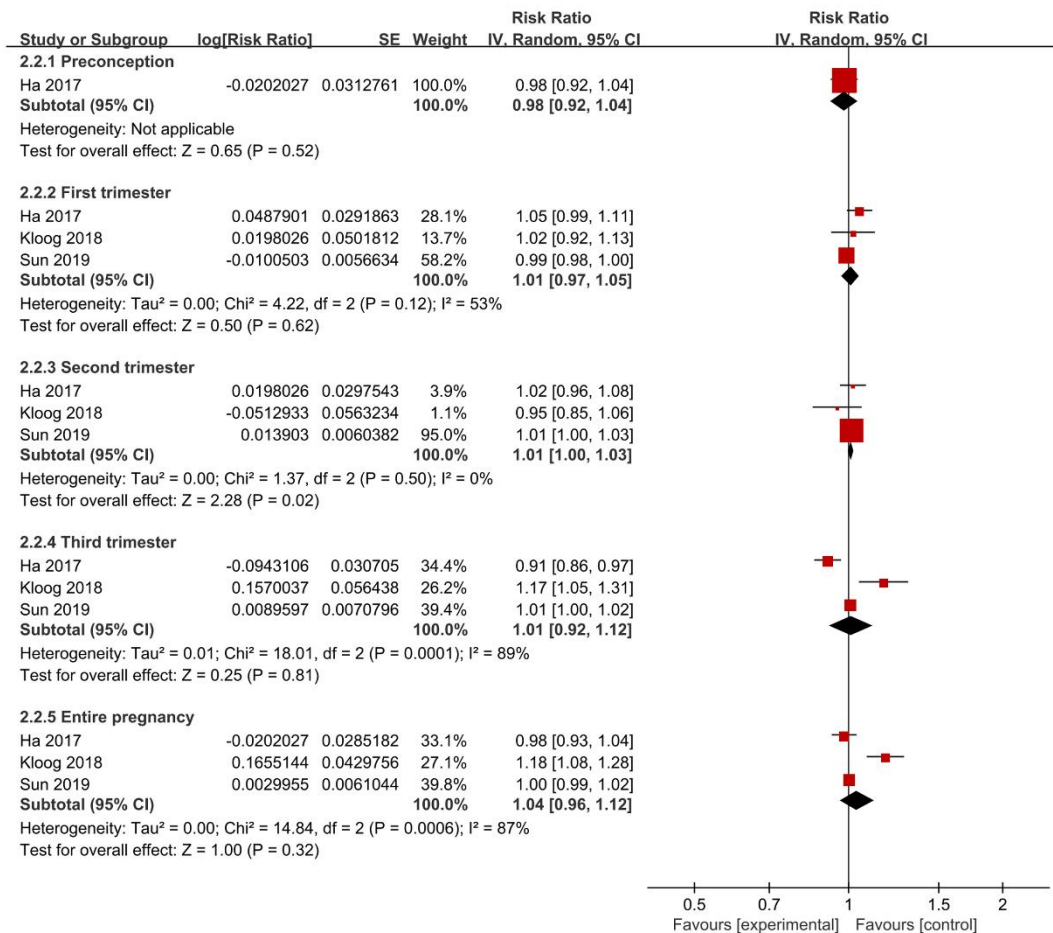

Supplementary Figure 11: Stillbirth sort by exposure time windows.

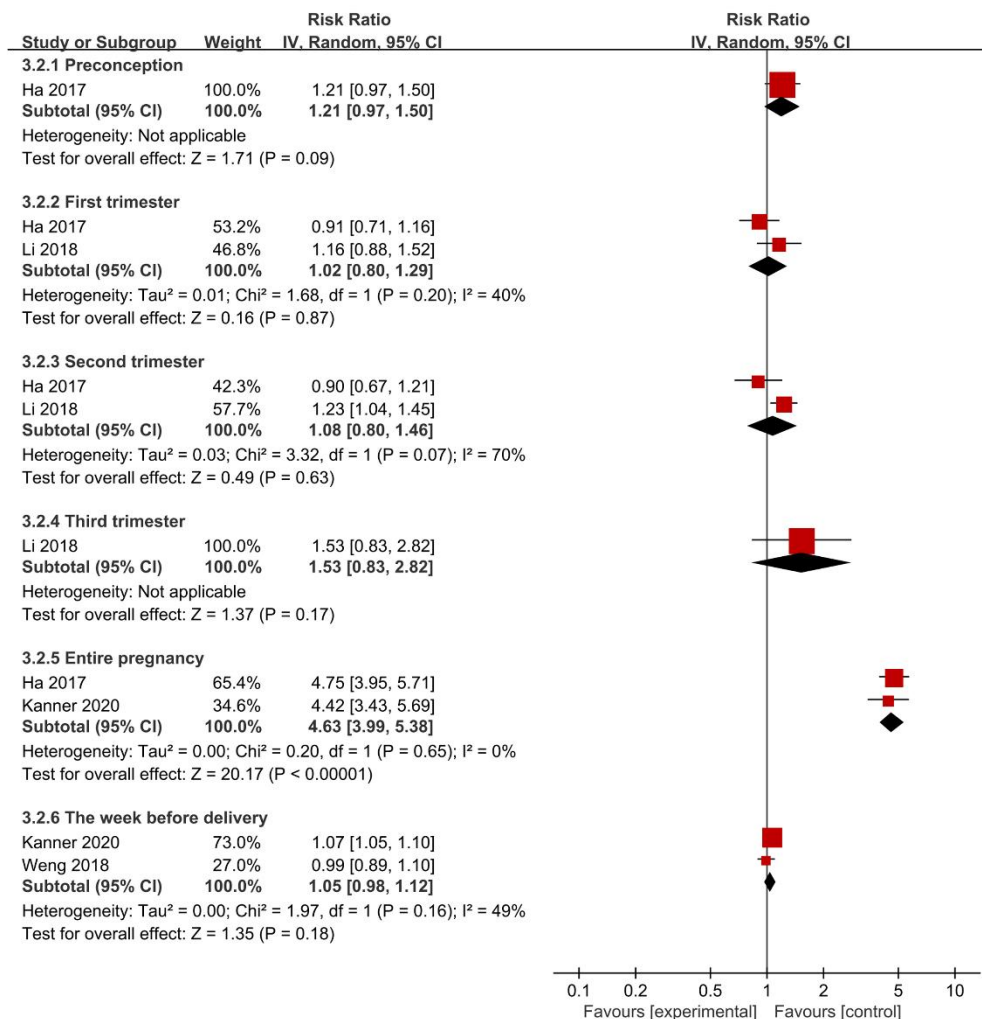



**Supplementary Table 1: Characteristics of included studies.**

| Name                              | Country           | Study design | Year of study | Climate zone   | Included meta-analysis | inSample (cases/total)  | sizeMain outcome                                                                                                                                                                                                                                                           |
|-----------------------------------|-------------------|--------------|---------------|----------------|------------------------|-------------------------|----------------------------------------------------------------------------------------------------------------------------------------------------------------------------------------------------------------------------------------------------------------------------|
| LBW                               |                   |              |               |                |                        |                         |                                                                                                                                                                                                                                                                            |
| Weng <i>et al</i> <sup>[34]</sup> | Taiwan, China     | Cohort study | 2001–2010     | Humid Tropical | Yes                    | Not provided/2,045,748  | Temperature at birth.<br>21.5–23.4°C (reference group)<br>Temperature 13.4–15.4°C<br>RR = 1.06 (1.01, 1.11)<br>Temperature 15.5–17.4°C<br>RR = 1.02 (0.99, 1.04)<br>Temperature 17.5–19.4°C<br>RR = 0.99 (0.97, 1.02)<br>Temperature 19.5–21.4°C<br>RR = 1.01 (0.99, 1.04) |
| Sun <i>et al</i> <sup>[46]</sup>  | The United States | Cohort study | 1989–2002     | –              | Yes                    | Not provided/29,597,735 | Birth weight. Mean daily temperature. Reference temperature 40th–50th<br>Entire pregnancy temperatures <10th. Birth weight (difference in gram compared to reference group)<br>Difference = –6 (–8, –4)<br>10th < Temperature <20th<br>Difference = –2 (–3, 0)             |

|                                     |                                        |   |    |                       |                                                 |
|-------------------------------------|----------------------------------------|---|----|-----------------------|-------------------------------------------------|
|                                     |                                        |   |    |                       | Outcome for small gestation weight              |
|                                     |                                        |   |    |                       | Temperature <10th                               |
|                                     |                                        |   |    |                       | Entire pregnancy:                               |
|                                     |                                        |   |    |                       | OR = 1.00 (0.99, 1.02)                          |
|                                     |                                        |   |    |                       | First trimester:                                |
|                                     |                                        |   |    |                       | OR = 0.99 (0.98, 1.00)                          |
|                                     |                                        |   |    |                       | Second trimester:                               |
|                                     |                                        |   |    |                       | OR = 1.01 (1.00, 1.03)                          |
|                                     |                                        |   |    |                       | Third trimester:                                |
|                                     |                                        |   |    |                       | OR = 1.01 (0.99, 1.02)                          |
| Poeran <i>et al</i> <sup>[43]</sup> | The Netherlands Cohort study 2000–2008 | – | No | Not provided/1460,401 | Per 1°C decrease in mean Tmin                   |
|                                     |                                        |   |    |                       | Periconceptional day                            |
|                                     |                                        |   |    |                       | Birth weight decrease = 0.20 (–0.10, 0.60)g     |
|                                     |                                        |   |    |                       | First trimester:                                |
|                                     |                                        |   |    |                       | Birth weight decrease = –0.30 (–0.80, 0.10)g    |
|                                     |                                        |   |    |                       | Second trimester:                               |
|                                     |                                        |   |    |                       | Birth weight decrease = 0.40 (0, 0.80)g         |
|                                     |                                        |   |    |                       | Third trimester:                                |
|                                     |                                        |   |    |                       | Birth weight decrease = 1.50 (1.20, 1.70)g      |
|                                     |                                        |   |    |                       | day of birth                                    |
|                                     |                                        |   |    |                       | Birth weight decrease = 0.10 (–0.20, 0.40)g     |
| Lawlor <i>et al</i> <sup>[42]</sup> | Aberdeen, Cohort study 1950–1956       | – | No | Not                   | Temperature increased per 1°C around conception |

Scotland

provided/12,150 Birth weight change = -2.40 (-4.60, -0.20)g

In middle of first trimester

Birth weight change = -5.40 (-7.90, -2.90)g

In middle of second trimester

Birth weight change = 1.80 (-0.70, 4.30)g

In middle of third trimester

Birth weight change = 1.30 (0.50, 2.10)g

Around time of birth

Birth weight change = 3.60 (1.60, 5.70)g

Temperature during the third trimester and at birth positively associated with birth weight

Kloog *et al*<sup>[45]</sup> Southern Israel –

2004–2013

Mediterranean

Yes

climate,

semi-arid

climate, arid

climate, and

extreme arid

climate

LBW:

1716/56,141

SGA:

8634/56,141

Compared to two intermediate quartiles of temperature.

The lowest quartile in entire pregnancy for SGA

OR = 1.18 (1.09, 1.29)

The lowest quartile in first trimester for SGA

OR = 1.02 (0.92, 1.12)

The lowest quartile in second trimester for SGA

OR = 0.95 (0.85, 1.06)

The lowest quartile in third trimester for SGA

OR = 1.17 (1.05, 1.31)

The lowest quartile in entire pregnancy for tLBW

|                                  |                   |                        |   |     |                        |                                                                                    |
|----------------------------------|-------------------|------------------------|---|-----|------------------------|------------------------------------------------------------------------------------|
|                                  |                   |                        |   |     |                        | OR = 1.33 (1.11, 1.58)                                                             |
|                                  |                   |                        |   |     |                        | The lowest quartile in first trimester for tLBW                                    |
|                                  |                   |                        |   |     |                        | OR = 0.92 (0.75, 1.13)                                                             |
|                                  |                   |                        |   |     |                        | The lowest quartile in second trimester for tLBW                                   |
|                                  |                   |                        |   |     |                        | OR = 0.94 (0.74, 1.18)                                                             |
|                                  |                   |                        |   |     |                        | The lowest quartile in third trimester for tLBW                                    |
|                                  |                   |                        |   |     |                        | OR = 1.17 (0.92, 1.49)                                                             |
| Ha et al<br>2017 <sup>[44]</sup> | The United States | Cohort study 2002–2008 | – | Yes | LBW:<br>4322/220,572   | Compared with mild temperature (5th–95th)<br>Low ambient temperature (5th) for SGA |
|                                  |                   |                        |   |     | SGA:<br>22,239/220,572 | Preconception RR = 0.98 (0.92, 1.04)<br>Entire pregnancy RR = 0.98 (0.93, 1.04)    |
|                                  |                   |                        |   |     |                        | First trimester RR = 1.05 (0.99, 1.11)                                             |
|                                  |                   |                        |   |     |                        | Second trimester RR = 1.02 (0.97, 1.09)                                            |
|                                  |                   |                        |   |     |                        | Third trimester RR = 0.91 (0.86, 0.97)                                             |
|                                  |                   |                        |   |     |                        | Low ambient temperature (5th) for tLBW                                             |
|                                  |                   |                        |   |     |                        | Preconception RR = 0.96 (0.83, 1.11)                                               |
|                                  |                   |                        |   |     |                        | Entire pregnancy RR = 2.57 (2.27, 2.91)                                            |
|                                  |                   |                        |   |     |                        | First trimester RR = 1.05 (0.92, 1.21)                                             |
|                                  |                   |                        |   |     |                        | Second trimester RR = 1.21 (1.05, 1.38)                                            |
|                                  |                   |                        |   |     |                        | Third trimester RR = 1.18 (1.03, 1.36)                                             |
| Bruckner et al                   | Uppsala,          | Cohort study 1915–1929 | – | No  | 359/13,657             | Birth weight for gestational age is not associated with                            |



|                                      |                          |                        |           |    |                        |                                                                                                                                                                                                                                                                                                                                                                               |
|--------------------------------------|--------------------------|------------------------|-----------|----|------------------------|-------------------------------------------------------------------------------------------------------------------------------------------------------------------------------------------------------------------------------------------------------------------------------------------------------------------------------------------------------------------------------|
| <i>al</i> <sup>[12]</sup>            | Sweden                   |                        |           |    |                        | temperature<br>Coefficients = -0.24 (-0.66, 018)                                                                                                                                                                                                                                                                                                                              |
| Pereira <i>et al</i> <sup>[41]</sup> | Perth, Australia         | Cohort study 1998–2006 | –         | No | SGA:<br>12,031/147,357 | The beta about proportion of optimal birthweight with temperature increase (interquartile range as a unit)<br>First trimester $\beta = 0.13$ (0, 0.26)<br>Second trimester $\beta = -0.05$ (-0.18, 0.08)<br>Third trimester $\beta = -0.15$ (-0.29, 0.02)<br>Entire pregnancy $\beta = -0.02$ (-0.11, 0.07)                                                                   |
| Ngo <i>et al</i> <sup>[36]</sup>     | Manhattan, New York, USA | Cohort study 1985–2010 | –         | No | Not provided/541,104   | Compared to comfortable temperature (45–65°F) Exposure to an extra day (<25°F) in entire pregnancy, birth weight reduces 1.8g ( $P < 0.01$ )<br>Exposure to an extra day (<25°F) in first trimester, birth weight reduces 0.8g ( $P < 0.05$ )<br>Second trimester, birth weight reduces 0.6g ( $P < 0.05$ )<br>Third trimester, the reduce of birth weight is no significance |
| Murray <i>et al</i> <sup>[40]</sup>  | Northern Ireland         | –                      | 1971–1986 | –  | No                     | Not provided/418,817<br>An increase of 1°C in daily mean Tmax in second trimester<br>Birth weight in male increase 1.02 (SD: 0.88) ( $P = 0.25$ )<br>Birth weight in female increase 3.50 (SD: 0.88) ( $P < 0.01$ )                                                                                                                                                           |

|                                        |                             |   |           |                                                      |     |                     |                                                                                                                                                                                                                                                                                                                                                                                                                                                                                                                                         |
|----------------------------------------|-----------------------------|---|-----------|------------------------------------------------------|-----|---------------------|-----------------------------------------------------------------------------------------------------------------------------------------------------------------------------------------------------------------------------------------------------------------------------------------------------------------------------------------------------------------------------------------------------------------------------------------------------------------------------------------------------------------------------------------|
| Molina and Saldarriaga <sup>[39]</sup> | Bolivia, Colombia, and Peru | – | 1990–2013 | –                                                    | No  | Not provided/86,021 | <p>First below historical mean temperature in whole pregnancy period</p> <p>The probability of LBW decreases 0.7% Compared to mean temperature (<math>\pm</math>omp SD)</p> <p>Exposure to low temperature (<math>&lt;-1.5</math> SD)</p> <p>First trimester birth weight = <math>-2.482</math> (NS)</p> <p>Second trimester birth weight = <math>19.608</math> (NS)</p> <p>Third trimester birth weight = <math>-8.483</math> (NS)</p> <p>Entire pregnancy birth weight = <math>1.959</math> (NS)</p>                                  |
| Elter <i>et al</i> <sup>[14]</sup>     | Istanbul, Turkey            | – | 1992–2003 | –                                                    | No  | Not provided/3333   | <p>The coefficient of multiple regression analysis of birth weight and temperature exposure during second trimester <math>\beta = 0.001</math> (<math>P &lt; 0.05</math>)</p>                                                                                                                                                                                                                                                                                                                                                           |
| Basagaña <i>et al</i> <sup>[47]</sup>  | Israel                      | – | 2010–2014 | Mediterranean climate, Steppe/semi-arid, Desert/arid | Yes | 16,860/624,940      | <p>Compared with average temperatures in the 41st–50th percentile range</p> <p>Mean temperature <math>&lt;10</math>th in entire pregnancy<br/>Birth weight = <math>-56</math> (<math>-63, -50</math>)g</p> <p>Mean temperature <math>&lt;10</math>th in first trimester<br/>Birth weight = <math>-10</math> (<math>-18, -2</math>)g</p> <p>Mean temperature <math>&lt;10</math>th in second trimester<br/>Birth weight = <math>-18</math> (<math>-27, -10</math>)g</p> <p>Mean temperature <math>&lt;10</math>th in third trimester</p> |

Birth weight = -46 (-55, -38)g

Mean temperature <10th in entire pregnancy

RR for tLBW = 1.35 (1.22, 1.49)

Mean temperature <10th in first trimester

RR for tLBW = 0.97 (0.86, 1.09)

Mean temperature <10th in second trimester

RR for tLBW = 1.06; (0.94, 1.19)

Mean temperature <10th in third trimester

RR for tLBW = 1.26 (1.12, 1.43)

PTB

Zheng *et al*<sup>[35]</sup> Changsha, China Cohort study 2004–2010 Humid Yes 145/3604  
subtropical

Low temperature (<10th)

Conception months:

OR = 1.17 (1.06, 1.28)

First trimester:

OR = 1.21 (0.92, 1.60)

Second trimester:

OR = 1.37 (1.15, 1.62)

Third trimester:

OR = 1.09 (1.01, 1.18)

Birth month:

OR = 1.05 (0.99, 1.11)

|                                   |               |                        |                |     |                         |                                                        |
|-----------------------------------|---------------|------------------------|----------------|-----|-------------------------|--------------------------------------------------------|
|                                   |               |                        |                |     |                         | Entire pregnancy:<br>OR = 1.42 (1.01, 2.00)            |
| Weng <i>et al</i> <sup>[34]</sup> | Taiwan, China | Cohort study 2001–2010 | Humid Tropical | Yes | Not<br>provided/2,045,7 | Temperature at birth.<br>21.5–23.4°C (reference group) |
|                                   |               |                        |                |     | 48                      | Temperature 13.4–15.4°C<br>RR = 1.14 (1.09, 1.18)      |
|                                   |               |                        |                |     |                         | Temperature 15.5–17.4<br>RR = 1.06 (1.04, 1.09)        |
|                                   |               |                        |                |     |                         | Temperature 17.5–19.4<br>RR = 1.03 (1.01, 1.06)        |
|                                   |               |                        |                |     |                         | Temperature 19.5–21.4<br>RR = 1.01 (0.99, 1.04)        |
| Wang <i>et al</i> <sup>[33]</sup> | China         | Cohort study 2013–2014 | –              | Yes | 104,493/1,281,8         | Low temperature (<5th)                                 |
|                                   |               |                        |                |     | 59                      | First trimester:<br>HR = 1.04 (1.03, 1.05)             |
|                                   |               |                        |                |     |                         | Second trimester:<br>HR = 1.01 (1.00, 1.01)            |
|                                   |               |                        |                |     |                         | Third trimester:<br>HR = 1.17 (1.12, 1.22)             |
|                                   |               |                        |                |     |                         | Entire pregnancy<br>HR = 1.03 (1.02, 1.04)             |
| Vicedo-Cabrera                    | Stockholm,    | Cohort study 1998–2006 | Temperate      | Yes | 1204/36,577             | Low temperature (<1st)                                 |

|                                      |               |                               |                                                        |     |                      |                                                                                                                                                                                                                                                                                                                   |
|--------------------------------------|---------------|-------------------------------|--------------------------------------------------------|-----|----------------------|-------------------------------------------------------------------------------------------------------------------------------------------------------------------------------------------------------------------------------------------------------------------------------------------------------------------|
| <i>et al</i> <sup>[32]</sup>         | Swiss         |                               | continental<br>climate and cold<br>winters.            |     |                      | 22–28 days before delivering<br>RR = 0.88 (0.64, 1.23)<br>15–21 days before delivering<br>RR = 0.93 (0.63, 1.38)<br>8–14 days before delivering<br>RR = 0.94 (0.59, 1.49)<br>0–7 days before delivering<br>RR = 0.81 (0.47, 1.39)<br>Low temperature (<25th)<br>Lag16–24 after exposure<br>RR = 1.01 (1.00, 1.02) |
| Sun <i>et al</i> <sup>[31]</sup>     | The<br>States | United Cohort study 1989–2002 | –                                                      | Yes | 2,973,909/31,921,046 | Increase days of extreme cold with lower RR = 0.99<br>(0.98, 0.99)                                                                                                                                                                                                                                                |
| Spolter <i>et al</i> <sup>[30]</sup> | Israel        | Cohort study 2004–2013        | Mediterranean<br>climate with cool<br>and rainy winter | Yes | 4852/62,547          | Average temperature of the week of birth is divided<br>into five quintiles<br>Reference temperature: third quintile<br>Temperature first quintile<br>For early preterm<br>HR = 1.16 (0.72, 1.85)<br>For late preterm<br>HR = 0.98 (0.83, 1.55)<br>For early term                                                  |

|                                        |                          |                        |                                                              |     |                   |                                                                                                                                                                                                                                                                                                 |
|----------------------------------------|--------------------------|------------------------|--------------------------------------------------------------|-----|-------------------|-------------------------------------------------------------------------------------------------------------------------------------------------------------------------------------------------------------------------------------------------------------------------------------------------|
| Mohammadi <i>et al</i> <sup>[29]</sup> | Sabzevar, Iran           | Cohort study 2011–2017 | Arid climate with four distinct seasons a hot and dry region | Yes | 3140/Not provided | HR = 0.99 (0.92, 1.08)<br>Lag0 highest impact, lag1, 2, 3, 4 also significant.<br>Compared to 50th, log0<br>1st RR = 1.76 (1.54, 2)<br>25th RR = 1.13 (1.02, 1.25)                                                                                                                              |
| Muresan <i>et al</i> <sup>[38]</sup>   | Romania                  | – 2014                 | A temperate climate with cool and humid winter               | No  | 138/Not provided  | Preterm birth frequency and mean weekly temperature $r = 0.306$ ( $P < 0.05$ ). SD in each week $r = 0.307$ ( $P < 0.01$ )                                                                                                                                                                      |
| Mathew <i>et al</i> <sup>[28]</sup>    | Alice springs, Australia | Cohort study 1986–2013 | Hot semi-arid with cool winter                               | Yes | 1401/16,870       | Cumulative effects of 24 days before delivery<br>Compared to 50th (14°C)<br>Mean daily minimum temperature (0°C)<br>RR = 1.072 (1.018, 1.130)<br>Mean daily minimum temperature (6°C)<br>RR = 1.367 (1.023, 1.824)                                                                              |
| Liu <i>et al</i> <sup>[27]</sup>       | Guangzhou, China         | Cohort study 2014–2017 | Subtropical climate with mild winters                        | Yes | 234/4101          | Compared with the mean temperature (24°C) as the reference<br>Low temperature 14°C (5th) during 2nd to 10th and 20th to 26th gestational weeks is negatively associated to preterm birth.<br>The strongest association is 4th and 23rd week, HR = 0.43 (0.26, 0.27) and HR = 0.59 (0.43, 0.83), |

respectively

18°C (25th)

1st to 9th and 20th to 26th gestational weeks is negatively associated to preterm birth.

The strongest association is 4th and 23rd week, HR = 0.62 (0.46, 0.83) and HR = 0.69 (0.56, 0.86), respectively

|                                    |                                        |                                       |     |                  |                                                                                                                                                                                                                                                                                                                                                                                                                                                                                                                                                            |
|------------------------------------|----------------------------------------|---------------------------------------|-----|------------------|------------------------------------------------------------------------------------------------------------------------------------------------------------------------------------------------------------------------------------------------------------------------------------------------------------------------------------------------------------------------------------------------------------------------------------------------------------------------------------------------------------------------------------------------------------|
| Liang <i>et al</i> <sup>[26]</sup> | Shenzhen, China Cohort study 2005–2011 | Subtropical climate with mild winters | Yes | 58,411/1,040,638 | Compared with the median daily mean temperature (24.5°C) as the reference<br>The cumulative effect of 1st temperature (9°C) for 30 days before delivery. RR = 1.72 (1.28, 2.33)<br>The cumulative effect of 5th temperature (12.5°C) for 30 days before delivery. RR = 1.96 (1.60, 2.39)<br>The lag0 of 1st temperature (9°C)<br>RR = 1.54 (1.36, 1.75)<br>The lag0 of 5th temperature (12.5°C)<br>RR = 1.49 (1.35, 1.63)<br>The lag5 of 1st temperature (9°C)<br>RR = 1.03 (1.00, 1.07)<br>The lag5 of 5th temperature (12.5°C)<br>RR = 1.05 (1.03, 1.07) |
|------------------------------------|----------------------------------------|---------------------------------------|-----|------------------|------------------------------------------------------------------------------------------------------------------------------------------------------------------------------------------------------------------------------------------------------------------------------------------------------------------------------------------------------------------------------------------------------------------------------------------------------------------------------------------------------------------------------------------------------------|

|                                         |                        |                        |                                 |     |                |                                                                                                                                                                                                                                                                                                                                                                                                                                                                                                                                                                                     |
|-----------------------------------------|------------------------|------------------------|---------------------------------|-----|----------------|-------------------------------------------------------------------------------------------------------------------------------------------------------------------------------------------------------------------------------------------------------------------------------------------------------------------------------------------------------------------------------------------------------------------------------------------------------------------------------------------------------------------------------------------------------------------------------------|
| Li <i>et al</i> <sup>[25]</sup>         | Brisbane,<br>Australia | Cohort study 1994–2013 | Humid<br>subtropical<br>climate | Yes | 22,822/289,351 | Compared with reference temperature<br>Low daily mean temperature (<5th)<br>First trimester:<br>HR = 1.01 (1.00, 1.03)<br>Second trimester:<br>HR = 1.01 (0.97, 1.06)<br>Third trimester:<br>HR = 1.21 (1.16, 1.27)<br>Daily Tmax and Tmin had similar association                                                                                                                                                                                                                                                                                                                  |
| Ha <i>et al</i><br>2017 <sup>[23]</sup> | The United<br>States   | Cohort study 2002–2008 | –                               | Yes | 26,130/223,375 | Compared with mild temperature (10th–90th)<br>Low ambient temperature (10th) for early preterm<br>Preconception RR = 1 (0.92, 1.09)<br>gestational week 1–7 RR = 1.20 (1.11, 1.30)<br>gestational week 8–14 RR = 0.96 (0.89, 1.05)<br>gestational week 15–21 RR = 1.00 (0.91, 1.09)<br>gestational week 22–28 RR = 0.93 (0.85, 1.03)<br><br>Low ambient temperature (10th) for late preterm<br>Preconception RR = 0.92 (0.86, 0.98)<br>gestational week 1–7 RR = 1.09 (1.04, 1.15)<br>gestational week 8–14 RR = 0.92 (0.87, 0.98)<br>gestational week 15–21 RR = 0.94 (0.89, 1.00) |



gestational week 22–28 RR = 0.97 (0.92, 1.03)

|                                  |       |                        |   |     |                |                                                                                                                                                                                                                                                                                                                                                                                                                                                                                                                                                                                                                                                                                   |
|----------------------------------|-------|------------------------|---|-----|----------------|-----------------------------------------------------------------------------------------------------------------------------------------------------------------------------------------------------------------------------------------------------------------------------------------------------------------------------------------------------------------------------------------------------------------------------------------------------------------------------------------------------------------------------------------------------------------------------------------------------------------------------------------------------------------------------------|
| Guo <i>et al</i> <sup>[20]</sup> | China | Cohort study 2010–2013 | – | Yes | 12,433/138,672 | Compared to moderate ambient temperature (5th to 95th) in different climate zone.<br>In cold area, low temperature (<5th) in cold area during 3-month preconception<br>OR = 0.89 (0.81, 0.98)<br>In 15–21 gestational weeks<br>OR = 0.90 (0.82, 0.98)<br>NS in other pregnancy windows.<br>In medium area, low temperature (<5th)<br>In 8–14 gestational weeks<br>OR = 0.86 (0.81, 0.91)<br>In 15–21 gestational weeks<br>OR = 0.92 (0.87, 0.98)<br>NS in other pregnancy windows.<br>In hot area, low temperature (<5th)<br>In preconception OR = 0.78 (0.73, 0.83)<br>In 1–7 gestational weeks<br>OR = 0.85 (0.80, 0.91)<br>In 8–14 gestational weeks<br>OR = 0.79 (0.74, 0.84) |
|----------------------------------|-------|------------------------|---|-----|----------------|-----------------------------------------------------------------------------------------------------------------------------------------------------------------------------------------------------------------------------------------------------------------------------------------------------------------------------------------------------------------------------------------------------------------------------------------------------------------------------------------------------------------------------------------------------------------------------------------------------------------------------------------------------------------------------------|

|                                  |                      |                        |                                   |     |                |                                                                                                                                                                                                                                                                                                                                                                                                                                                                                                                                                  |
|----------------------------------|----------------------|------------------------|-----------------------------------|-----|----------------|--------------------------------------------------------------------------------------------------------------------------------------------------------------------------------------------------------------------------------------------------------------------------------------------------------------------------------------------------------------------------------------------------------------------------------------------------------------------------------------------------------------------------------------------------|
|                                  |                      |                        |                                   |     |                | In 15–21 gestational weeks<br>OR = 0.90 (0.84, 0.95)                                                                                                                                                                                                                                                                                                                                                                                                                                                                                             |
|                                  |                      |                        |                                   |     |                | In 4 weeks before delivery<br>OR = 0.87 (0.82, 0.93)                                                                                                                                                                                                                                                                                                                                                                                                                                                                                             |
|                                  |                      |                        |                                   |     |                | In 1 week before delivery<br>OR = 0.97 (0.91, 1.02)                                                                                                                                                                                                                                                                                                                                                                                                                                                                                              |
| Cox <i>et al</i> <sup>[13]</sup> | Flanders,<br>Belgium | Cohort study 1998–2011 | Oceanic<br>temperature<br>climate | Yes | 27,076/807,835 | Compared with median temperature (8.3°C for daily<br>Tmin or 14.7°C for daily Tmax)<br>In moderate cold (<5th, –2°C for Tmin) during a<br>week before delivery<br>RR = 1.00 (0.93, 1.07)<br>In moderate cold (<5th, 2.5°C for Tmax) during a<br>week before delivery<br>RR = 0.97 (0.88, 1.05)<br><br>In extreme cold (<1st for Tmin) during a week before<br>delivery<br>RR = 0.91 (0.80, 1.03)<br>In extreme cold (<1st for Tmax) during a week before<br>delivery<br>RR = 0.96 (0.86, 1.08)<br>In moderate cold (<5th, –2°C for Tmin) in lag1 |

|                                    |               |                        |                                         |     |              |                                                                                                                                                                                                                                                                                                                                                                                                                                                                                                                                                                                          |
|------------------------------------|---------------|------------------------|-----------------------------------------|-----|--------------|------------------------------------------------------------------------------------------------------------------------------------------------------------------------------------------------------------------------------------------------------------------------------------------------------------------------------------------------------------------------------------------------------------------------------------------------------------------------------------------------------------------------------------------------------------------------------------------|
|                                    |               |                        |                                         |     |              | RR = 1.06 (1.01, 1.06)                                                                                                                                                                                                                                                                                                                                                                                                                                                                                                                                                                   |
|                                    |               |                        |                                         |     |              | In moderate cold (<5th, 2.5°C for Tmin) in lag 2                                                                                                                                                                                                                                                                                                                                                                                                                                                                                                                                         |
|                                    |               |                        |                                         |     |              | RR = 1.05 (1.02, 1.08)                                                                                                                                                                                                                                                                                                                                                                                                                                                                                                                                                                   |
|                                    |               |                        |                                         |     |              | NS for the other lag days and Tmax                                                                                                                                                                                                                                                                                                                                                                                                                                                                                                                                                       |
| Cheng <i>et al</i> <sup>[22]</sup> | XuZhou, China | Cohort study 2016–2019 | Subtropical<br>humid monsoon<br>climate | Yes | 4623/103,876 | Compared with median ambient temperature (50th,<br>16.8°C)<br>The RRs of cumulative effect of low temperature (1st,<br>–2.8°C)<br>Lag 0 RR = 1.51 (1.13, 2.01)<br>Lag 0–1 RR = 1.66 (1.18, 2.34)<br>Lag 0–2 RR = 1.58 (1.12, 2.22)<br>Lag 0–3 RR = 1.48 (1.02, 2.14)<br>Lag 0–4 RR = 1.42 (0.94, 2.13)<br>Lag 0–5 RR = 1.37 (0.88, 2.15)<br>Lag 0–6 RR = 1.34 (0.82, 2.19)<br>Lag 0–7 RR = 1.31 (0.76, 2.24)<br>Lag 0–8 RR = 1.27 (0.70, 2.29)<br>Lag 0–9 RR = 1.232(0.65, 2.34)<br><br>The RRs of cumulative effect of low temperature<br>(25th, 6.8°C)<br>Lag 0 RR = 1.31 (1.11, 1.56) |

|                                        |                              |                        |                           |     |                          |                                                                                                                                                  |
|----------------------------------------|------------------------------|------------------------|---------------------------|-----|--------------------------|--------------------------------------------------------------------------------------------------------------------------------------------------|
|                                        |                              |                        |                           |     |                          | Lag 0–1 RR = 1.46 (1.18, 1.79)                                                                                                                   |
|                                        |                              |                        |                           |     |                          | Lag 0–2 RR = 1.48 (1.20, 1.84)                                                                                                                   |
|                                        |                              |                        |                           |     |                          | Lag 0–3 RR = 1.491 (1.17, 1.90)                                                                                                                  |
|                                        |                              |                        |                           |     |                          | Lag 0–4 RR = 1.50 (1.15, 1.96)                                                                                                                   |
|                                        |                              |                        |                           |     |                          | Lag 0–5 RR = 1.52 (1.13, 2.04)                                                                                                                   |
|                                        |                              |                        |                           |     |                          | Lag 0–6 RR = 1.54 (1.11, 2.13)                                                                                                                   |
|                                        |                              |                        |                           |     |                          | Lag 0–7 RR = 1.55 (1.08, 2.22)                                                                                                                   |
|                                        |                              |                        |                           |     |                          | Lag 0–8 RR = 1.56 (1.05, 2.32)                                                                                                                   |
|                                        |                              |                        |                           |     |                          | Lag 0–9 RR = 1.57 (1.03, 2.42)                                                                                                                   |
| Bruckner <i>et al</i> <sup>[12]</sup>  | Uppsala, Sweden              | Cohort study 1915–1929 | –                         | No  | 359/13,657               | Below the 25th percentile of ambient temperature, a 1°C increase in ambient temperature during entire pregnancy HR = 0.60 (0.51, 0.71)           |
| Zhou <i>et al</i> <sup>[15]</sup>      | Henan, China                 | Cohort study 2013–2016 | Temperate monsoon climate | Yes | 33,505/1,231,715         | Exposure to extreme cold (<10th) within 3 weeks or longer before conception can elevate the risk of PTB, especially late PTB                     |
| Yackerson <i>et al</i> <sup>[37]</sup> | Negev, Israel                | Cohort study 1999      | Semi-arid area            | No  | 992/11,979               | Tmax regression coefficient = –0.09 (SE = 0.03, <i>P</i> < 0.01)                                                                                 |
| Ngo <i>et al</i> <sup>[36]</sup>       | Manhattan, New York, USA     | Cohort study 1985–2010 | –                         | No  | Not provided/510,781     | Compared to comfortable temperature (45–65°F) Exposure to an extra day (<25°F) in any period of pregnancy is NS about reducing gestational weeks |
| Liang <i>et al</i> <sup>[21]</sup>     | Dongguan and Shenzhen, China | Cohort study 2006–2010 | Subtropical climate       | Yes | Dongguan: 24,226/435,607 | The cumulative effect of cold spell for lag 0–6 on preterm birth                                                                                 |

|                                 |                  |                        |                                       |     |                |                                                                       |
|---------------------------------|------------------|------------------------|---------------------------------------|-----|----------------|-----------------------------------------------------------------------|
|                                 |                  |                        |                                       |     |                | Shenzhen: Dongguan RR = 1.32 (1.10, 1.58)                             |
|                                 |                  |                        |                                       |     | 24,177/469,188 | Shenzhen RR = 1.40 (1.18, 1.68)                                       |
|                                 |                  |                        |                                       |     |                | On early preterm birth (20–33 weeks)                                  |
|                                 |                  |                        |                                       |     |                | Dongguan RR = 1.09 (0.76, 1.57)                                       |
|                                 |                  |                        |                                       |     |                | Shenzhen RR = 1.11 (0.75, 1.63)                                       |
|                                 |                  |                        |                                       |     |                | On late preterm birth (34–36 weeks)                                   |
|                                 |                  |                        |                                       |     |                | Dongguan RR = 1.40 (1.15, 1.71)                                       |
|                                 |                  |                        |                                       |     |                | Shenzhen RR = 1.51 (1.24, 1.83)                                       |
|                                 |                  |                        |                                       |     |                | When maternal age <35 years the effect of cold spell on preterm birth |
|                                 |                  |                        |                                       |     |                | Dongguan RR = 1.40 (1.16, 1.69)                                       |
|                                 |                  |                        |                                       |     |                | Shenzhen RR = 1.45 (1.20, 1.74)                                       |
|                                 |                  |                        |                                       |     |                | Maternal age >35 years                                                |
|                                 |                  |                        |                                       |     |                | Dongguan RR = 0.57 (0.26, 1.27)                                       |
|                                 |                  |                        |                                       |     |                | Shenzhen RR = 1.09 (0.54, 2.22)                                       |
| He <i>et al</i> <sup>[24]</sup> | Guangzhou, China | Cohort study 2001–2011 | Subtropical climate with mild winters | Yes | 47,209/838,146 | Compared with the median weekly mean temperature (24.4°C)             |
|                                 |                  |                        |                                       |     |                | Low ambient temperature in the whole-pregnancy (<1st, 7.6°C)          |
|                                 |                  |                        |                                       |     |                | HR = 1.12 (1.05, 1.21)                                                |
|                                 |                  |                        |                                       |     |                | Low ambient temperature in the late pregnancy (<1st, 7.6°C)           |

HR = 1.12 (1.05, 1.21)

Low ambient temperature during 28 days before delivery (<1st, 7.6°C)

HR = 1.18 (1.10, 1.26)

Low ambient temperature during 7 days before delivery (<1st, 7.6°C)

HR = 1.14 (1.09, 1.20)

Low ambient temperature in the whole-pregnancy (<5th, 11.2°C)

HR = 1.09 (1.03, 1.15)

Low ambient temperature in the late pregnancy (<5th, 11.2°C)

HR = 1.09 (1.03, 1.15)

Low ambient temperature during 28 days before delivery (<5th, 11.2°C)

HR = 1.13 (1.07, 1.19)

Low ambient temperature during 7 days before delivery (<5th, 11.2°C)

HR = 1.10 (1.06, 1.14)

Stillbirth

Weng *et al*<sup>[34]</sup> Taiwan, China Cohort study 2001–2010 Humid Tropical Yes Not

Temperature at birth.

|                                     |                        |                        |                                 |     |              |                                                                                                                                                                                                                                                                    |
|-------------------------------------|------------------------|------------------------|---------------------------------|-----|--------------|--------------------------------------------------------------------------------------------------------------------------------------------------------------------------------------------------------------------------------------------------------------------|
|                                     |                        |                        |                                 |     |              | provided/2,045,7 21.5–23.4°C (reference group)                                                                                                                                                                                                                     |
|                                     |                        |                        |                                 |     | 48           | Temperature 13.4–15.4°C<br>RR = 0.99 (0.89, 1.10)<br>Temperature 15.5–17.4<br>RR = 1.01 (0.95, 1.07)<br>Temperature 17.5–19.4<br>RR = 0.96 (0.90, 1.02)<br>Temperature 19.5–21.4<br>RR = 0.99 (0.93, 1.05)                                                         |
| Li <i>et al</i> <sup>[25]</sup>     | Brisbane,<br>Australia | Cohort study 1994–2013 | Humid<br>subtropical<br>climate | Yes | 1783/289,351 | Compared with reference temperature<br>Low daily mean temperature (<5th)<br>First trimester:<br>HR = 1.16 (0.88, 1.52)<br>Second trimester:<br>HR = 1.23 (1.04, 1.45)<br>Third trimester:<br>HR = 1.53 (0.83, 2.81)<br>Daily Tmax and Tmin had similar association |
| Kanner <i>et al</i> <sup>[49]</sup> | The United<br>States   | Cohort study 2002–2010 | –                               | Yes | 500/112,005  | Compared with moderate temperatures (10th–90th)<br>Low ambient temperature in the whole-pregnancy (<10th)<br>OR = 4.42 (3.43, 5.69)                                                                                                                                |

|                                       |                   |                        |   |     |             |                                                                                                                                                                                                                                                           |
|---------------------------------------|-------------------|------------------------|---|-----|-------------|-----------------------------------------------------------------------------------------------------------------------------------------------------------------------------------------------------------------------------------------------------------|
|                                       |                   |                        |   |     |             | Acute low ambient temperature during a week before delivery (<10th)<br>OR = 1.07 (1.04, 1.09)                                                                                                                                                             |
| Ha <i>et al</i> <sup>[48]</sup>       | The United States | Cohort study 2002–2008 | – | Yes | 992/223,375 | Compared with mild temperature (10th–90th)<br>Low ambient temperature (10th) for stillbirth<br>Preconception OR = 1.21 (0.97, 1.50)<br>Whole Pregnancy OR = 4.75 (3.95, 5.71)<br>Trimester 1 OR = 0.91 (0.71, 1.16)<br>Trimester 2 OR = 0.90 (0.68, 1.22) |
| Bruckner <i>et al</i> <sup>[12]</sup> | Uppsala, Sweden   | Cohort study 1915–1929 | – | No  | 359/13,657  | A 1°C decrease in ambient temperature during entire pregnancy<br>HR = 1.08 (1.00, 1.17)                                                                                                                                                                   |

---

HR: Hazard ratio; LBW: Low birth weight; NS: No significant; OR: Odds ratio; PTB: Preterm birth; RR: Risk ratio; SD: Standard deviation; SE: Standard error; SGA: Small for gestational ages; tLBW: Term low birth weight; Tmax: Maximum temperature; Tmin: Minimum temperature.



**Supplementary Table 2: Quality of evidence in included studies.**

| Study                                  | Newcastle–Ottawa scale score |               |                   | Total score (* as 1 point) | Study quality |
|----------------------------------------|------------------------------|---------------|-------------------|----------------------------|---------------|
|                                        | Selection                    | Comparability | Outcome /exposure |                            |               |
| Bruckner <i>et al</i> <sup>[12]</sup>  | **                           | **            | ***               | 7                          | High          |
| Basagaña <i>et al</i> <sup>[47]</sup>  | ***                          | 0             | ***               | 6                          | Moderate      |
| Cheng <i>et al</i> <sup>[22]</sup>     | **                           | 0             | ***               | 5                          | Moderate      |
| Cox <i>et al</i> <sup>[13]</sup>       | ***                          | **            | ***               | 8                          | High          |
| Elter <i>et al</i> <sup>[14]</sup>     | *                            | **            | ***               | 6                          | Moderate      |
| Guo <i>et al</i> <sup>[20]</sup>       | ***                          | **            | ***               | 8                          | High          |
| Ha <i>et al</i> <sup>[23]</sup>        | ***                          | **            | ***               | 8                          | High          |
| Ha <i>et al</i> <sup>[44]</sup>        | ***                          | **            | ***               | 8                          | High          |
| Ha <i>et al</i> <sup>[48]</sup>        | ***                          | **            | ***               | 8                          | High          |
| He <i>et al</i> <sup>[24]</sup>        | ***                          | **            | ***               | 8                          | High          |
| Kanner <i>et al</i> <sup>[49]</sup>    | ***                          | **            | ***               | 8                          | High          |
| Kloog <i>et al</i> <sup>[45]</sup>     | ***                          | **            | ***               | 8                          | High          |
| Lawlor <i>et al</i> <sup>[42]</sup>    | ***                          | **            | ***               | 8                          | High          |
| Li <i>et al</i> <sup>[25]</sup>        | ***                          | **            | ***               | 8                          | High          |
| Liang <i>et al</i> <sup>[26]</sup>     | ***                          | *             | ***               | 7                          | High          |
| Liang <i>et al</i> <sup>[21]</sup>     | ***                          | *             | ***               | 7                          | High          |
| Liu <i>et al</i> <sup>[27]</sup>       | ****                         | **            | ***               | 9                          | High          |
| Mathew <i>et al</i> <sup>[28]</sup>    | ***                          | 0             | ***               | 6                          | Moderate      |
| Mohammadi <i>et al</i> <sup>[29]</sup> | ***                          | *             | ***               | 7                          | High          |
| Molina and Saldarriaga <sup>[39]</sup> | ***                          | 0             | ***               | 6                          | Moderate      |
| Muresan <i>et al</i> <sup>[38]</sup>   | ***                          | 0             | **                | 5                          | Moderate      |
| Murray <i>et al</i> <sup>[40]</sup>    | **                           | *             | ***               | 6                          | Moderate      |
| Ngo <i>et al</i> <sup>[36]</sup>       | ***                          | 0             | ***               | 6                          | Moderate      |
| Pereira <i>et al</i> <sup>[41]</sup>   | ***                          | **            | ***               | 8                          | High          |

|                                             |     |    |     |   |          |
|---------------------------------------------|-----|----|-----|---|----------|
| Poeran <i>et al</i> <sup>[43]</sup>         | *** | *  | *** | 7 | High     |
| Spolter <i>et al</i> <sup>[30]</sup>        | *** | *  | *** | 7 | High     |
| Sun <i>et al</i> <sup>[31]</sup>            | *** | ** | *** | 8 | High     |
| Sun <i>et al</i> <sup>[46]</sup>            | *** | *  | *** | 7 | High     |
| Vicedo-Cabrera <i>et al</i> <sup>[32]</sup> | **  | 0  | *** | 5 | Moderate |
| Wang <i>et al</i> <sup>[33]</sup>           | *** | ** | *** | 8 | High     |
| Weng <i>et al</i> <sup>[34]</sup>           | *** | ** | *** | 8 | High     |
| Yackerson <i>et al</i> <sup>[37]</sup>      | *** | 0  | *** | 6 | Moderate |
| Zheng <i>et al</i> <sup>[35]</sup>          | *** | ** | *** | 7 | High     |
| Zhou <i>et al</i> <sup>[15]</sup>           | *** | ** | *** | 8 | High     |

---

**Supplementary Table 3: Low ambient temperature exposure and adverse birth outcomes.**

| <b>Outcome</b>            | <b><i>N</i> of study</b> | <b>Pooled RR (95% CI)</b> | <b><i>I</i><sup>2</sup> (%)</b> |
|---------------------------|--------------------------|---------------------------|---------------------------------|
| Preterm birth             | 18                       | 1.08 (1.04, 1.13)         | 93                              |
| Low-birth weight          | 4                        | 1.07 (1.03, 1.12)         | 0                               |
| Small for gestational age | 3                        | 1.00 (0.99, 1.02)         | 14                              |
| Stillbirth                | 4                        | 1.12 (0.93, 1.36)         | 59                              |

CI: Confidence interval; RR: Risk ratio.

**Supplementary Table 4: The result of trim and fill method to evaluate association of preterm birth.**

| <b>Trimming estimator: Linear</b>               |                 |        |         |                 |                |
|-------------------------------------------------|-----------------|--------|---------|-----------------|----------------|
| <b>Meta-analysis type: Random-effects model</b> |                 |        |         |                 |                |
| Iteration                                       | Estimate        | Tn     | To trim | diff            |                |
| 1                                               | 0.08            | 99     | 2       | 171             |                |
| 2                                               | 0.05            | 114    | 3       | 30              |                |
| 3                                               | 0.05            | 116    | 3       | 4               |                |
| 4                                               | 0.05            | 116    | 3       | 0               |                |
| <b>Filled meta-analysis (exponential form)</b>  |                 |        |         |                 |                |
| Method                                          | Pooled estimate | 95% CI |         | <i>P</i> -value | No. of studies |
|                                                 |                 | Lower  | Upper   |                 |                |
| Random                                          | 1.05            | 1.01   | 1.10    | 0.03            | 21             |

CI: Confidence interval.

**Supplementary Table 5: Subgroup analysis of different exposure time windows and birth weight.**

| Name                                   | Birth weight change in different periods of pregnancy |                          |                         |                  |
|----------------------------------------|-------------------------------------------------------|--------------------------|-------------------------|------------------|
|                                        | First trimester                                       | Second trimester         | Third trimester         | Entire pregnancy |
| Basagaña <i>et al</i> <sup>[47]</sup>  | -10 (-18, -2)g                                        | -18 (-27, -10)g          | -46 (-55, -38)g         | -56 (-63, -50)g  |
| Molina and Saldarriaga <sup>[39]</sup> | -2.40 (-3.54, -1.26)g                                 | -1.48 (-2.64, -0.32)g    | -0.39 (-1.74, 0.96)g    | -                |
| Ngo <i>et al</i> <sup>[36]</sup>       | -2.48 (-59.62, -54.65)g                               | -19.61 (-28.34, -67.56)g | -1.96 (-86.11, -90.03)g | -                |
| Sun <i>et al</i> 2019 <sup>[46]</sup>  | -                                                     | -                        | -                       | -6 (-8, -2)g     |
